# Supplementary material
Source: publisher figshare collection journal article supplement (https://frontiersin.figshare.com/ndownloader/files/33958091)
Supplement: Supplementary file [file 33958091]

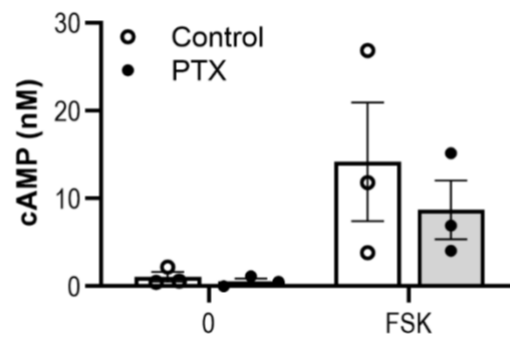

**Supplementary Figure S1. Pertussis toxin treatment has no significant effect on forskolin-induced cAMP in Ishikawa cells.** Ishikawa cells were treated with or without pertussis toxin (PTX, 500 ng/ml, 18 h) and subsequently treated with IBMX (0.5 mM, 15 min), then FSK (3  $\mu$ M) for 5 min. Mean  $\pm$  SEM, n = 3.

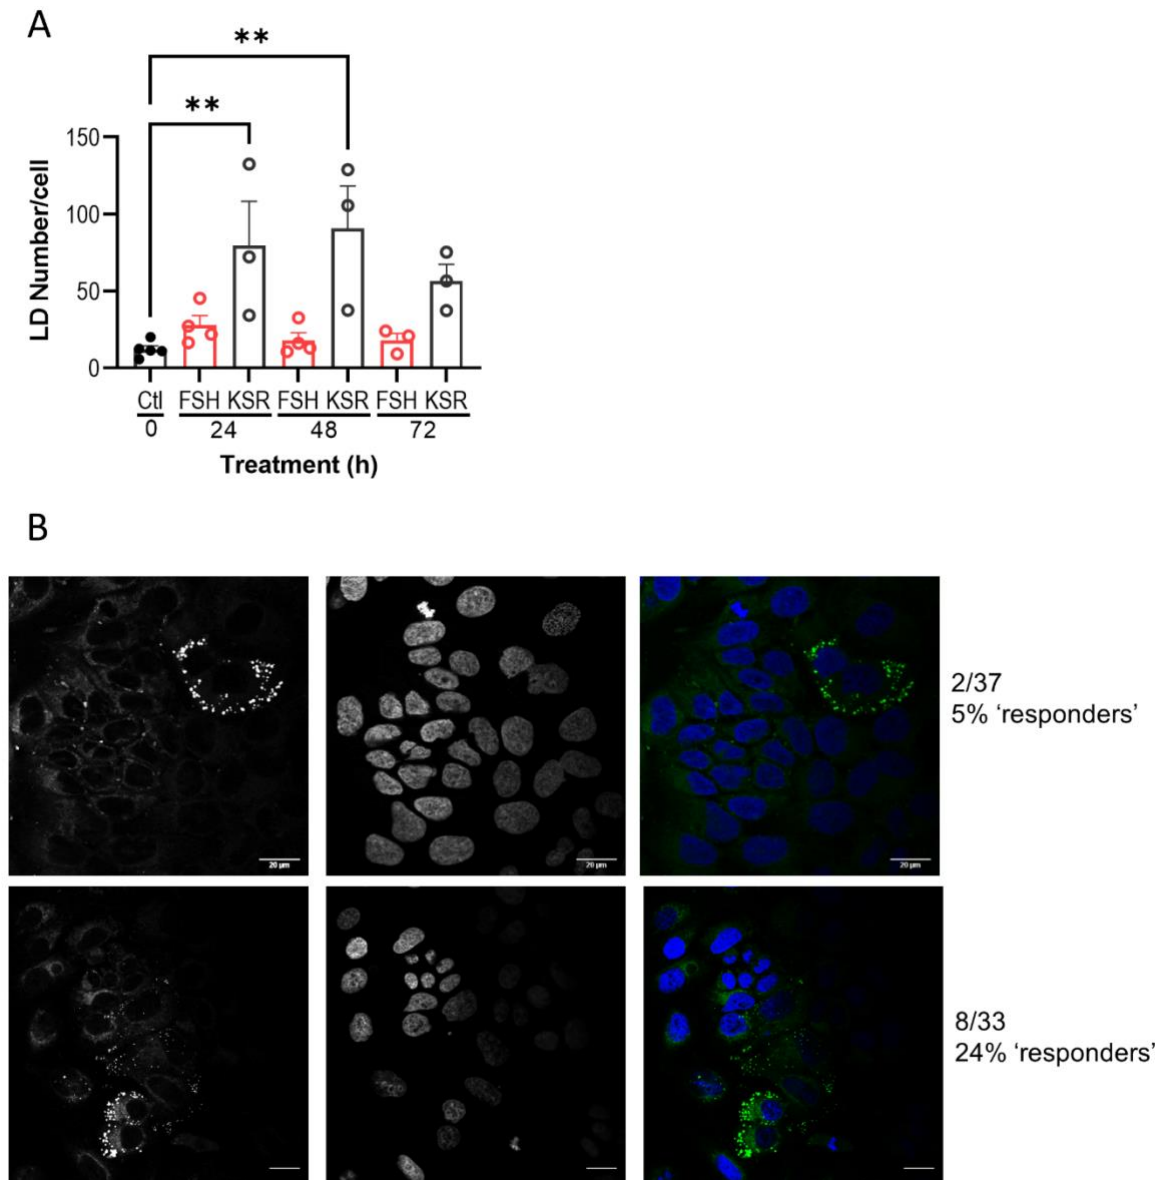

**Supplementary Figure S2. FSH induces an increase in lipid droplet (LD) size but not number in a subpopulation of cells. (A)** Assessment of LD number per Ishikawa cell after FSH (10 nM) or KSR (15% v/v) treatment for 24-, 48-, or 72-h. At the appropriate time point, cells were fixed and stained with neutral lipid dye BODIPY 493/503. Cells were imaged using confocal microscopy. 4-15 cells were imaged and analyzed per condition. Data represent mean  $\pm$  SEM,  $n = 3$  or more. One-way ANOVA with Dunnett's post-hoc test,  $**p < 0.01$ . **(B)** Representative images showing proportion of Ishikawa cells 'activated' following FSH treatment (24h) in a wider ROI. Scale bar represents 20  $\mu\text{m}$ .

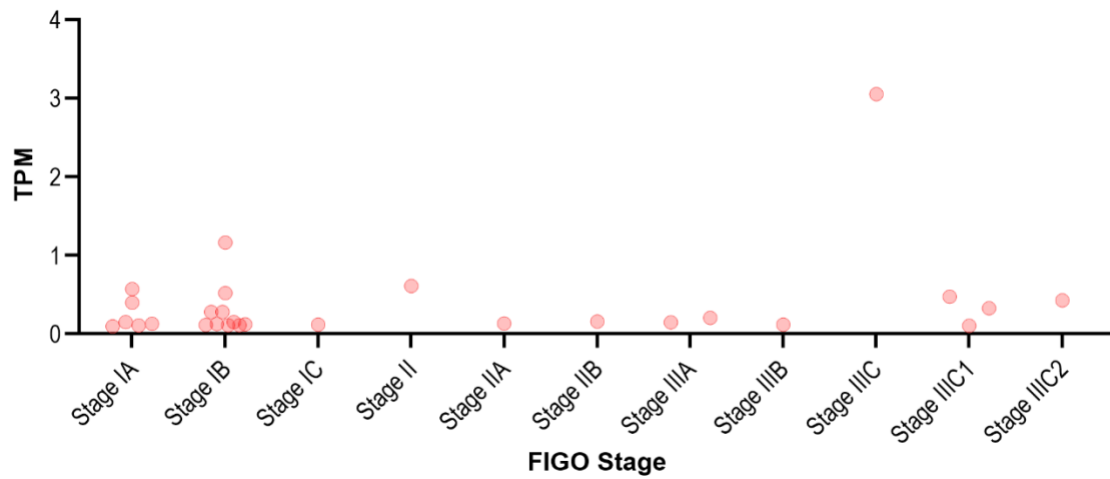

**Supplementary Figure S3. FSHR expression in distinct stages of endometrial adenocarcinoma.** FIGO staging of 28 human endometrial adenocarcinoma tumors expressing *FSHR* at greater than 0.10 TPM.
